# Supplementary material
Source: Elsevier journal article supplement (https://www.sciencedirect.com/science/article/pii/S0210569120300619)
Supplement: mmc2 [file S0210569120300619:mmc2.pdf]

## Apéndice B

### Características de los estudios incluidos

#### Beitler 2019

|               |                                                                                                                                                                                                                                                                                                                                                                                                                                                                                                                                                                                                                                                                                                                                                                                                                                                                                                                                                                                                                                                                                                                                 |
|---------------|---------------------------------------------------------------------------------------------------------------------------------------------------------------------------------------------------------------------------------------------------------------------------------------------------------------------------------------------------------------------------------------------------------------------------------------------------------------------------------------------------------------------------------------------------------------------------------------------------------------------------------------------------------------------------------------------------------------------------------------------------------------------------------------------------------------------------------------------------------------------------------------------------------------------------------------------------------------------------------------------------------------------------------------------------------------------------------------------------------------------------------|
| Métodos       | <p><u>Diseño del estudio</u>: ensayo clínico aleatorizado de fase 2</p> <p><u>Fechas de estudio</u>: inscripción entre el 31 de octubre de 2012 y el 14 de septiembre de 2017; El seguimiento a largo plazo se completó el 30 de julio de 2018.</p> <p><u>Entorno</u>: internación, multicéntrico, internacional.</p> <p><u>País</u>: Estados Unidos, Canadá</p>                                                                                                                                                                                                                                                                                                                                                                                                                                                                                                                                                                                                                                                                                                                                                                |
| Participantes | <p>200 pacientes de 16 años o más con inicio agudo de SDRA según la definición de la Conferencia de Consenso de Berlín, con 36 horas o menos desde el cumplimiento de los criterios de Berlín.</p> <p><u>Criterio de exclusión</u>:</p> <p>Haber recibido VM más de 96 horas.</p> <p>Varices esofágicas recientemente tratadas o sangrantes, estenosis esofágica, hematemesis, trauma esofágico, cirugía esofágica reciente u otra contraindicación para la colocación de una sonda nasogástrica</p> <p>Coagulopatía severa</p> <p>Antecedentes de trasplante pulmonar</p> <p>Presión intracraneal elevada o afecciones en las que deben evitarse las elevaciones de la presión intracraneal inducidas por hipercapnia</p> <p>Evidencia de fístula pulmonar activa</p> <p>Participación en otros ensayos de intervención para SDRA o para sepsis en los últimos 30 días.</p> <p>Enfermedad neuromuscular que afecte la capacidad de ventilación espontánea.</p> <p>Enfermedad hepática crónica grave, definida como un puntaje de Child-Pugh <math>\geq 12</math></p> <p>Rechazo del tratamiento con VM durante al menos 24</p> |

|                |                                                                                                                                                                                                                                                                                                                                                                                                                                                                                                                                                                                                                                                                                                                                                                                                                                                                                                                                                                                                                                                                                                                                                                                                                    |
|----------------|--------------------------------------------------------------------------------------------------------------------------------------------------------------------------------------------------------------------------------------------------------------------------------------------------------------------------------------------------------------------------------------------------------------------------------------------------------------------------------------------------------------------------------------------------------------------------------------------------------------------------------------------------------------------------------------------------------------------------------------------------------------------------------------------------------------------------------------------------------------------------------------------------------------------------------------------------------------------------------------------------------------------------------------------------------------------------------------------------------------------------------------------------------------------------------------------------------------------|
|                | <p>horas.</p> <p>Incapacidad para obtener el consentimiento informado del paciente o sustituto.</p> <p>Uso de terapias de rescate antes de la inscripción (por ejemplo, óxido nítrico, ECMO, posicionamiento propenso, oscilación de alta frecuencia). Esto no excluye los casos en que estas terapias se utilizaron como el modo inicial de ventilación.</p> <p><u>Edad:</u></p> <p>Grupo Intervención: mediana 58 RIQ (47 a 66) años.</p> <p>Grupo Control: mediana 57.5 RIQ (43 a 69) años.</p> <p><u>Sexo:</u></p> <p>Grupo Intervención: 38 mujeres (37,3%), 64 hombres (62,7%)</p> <p>Grupo Control: 54 mujeres (55,1%), 44 hombres (44,9%)</p>                                                                                                                                                                                                                                                                                                                                                                                                                                                                                                                                                              |
| Intervenciones | <p><u>Grupo Intervención (n = 102):</u> la PEEP se evaluó al menos una vez al día y se ajustó según fuera necesario para mantener una Presión transpulmonar al final de la espiración entre 0 y 6 cm H<sub>2</sub>O, asegurando que la PEEP nunca fue menor ni sustancialmente mayor que la presión pleural estimada por Pes.</p> <p>Para disminuir la sobredistensión, si la Presión transpulmonar inspiratoria excedía los 20 cm H<sub>2</sub>O, el volumen corriente se redujo a tan solo 4 ml / kg de peso corporal predicho (PBW). Para disnea o acidemia severas, el volumen corriente podría incrementarse hasta 8 ml / kg de PBW, siempre que la Presión transpulmonar inspiratoria permaneciera en 20 cm H<sub>2</sub>O o menos.</p> <p><u>Grupo control (n = 98):</u> la PEEP se ajustó para mantener la combinación PEEP-FIO<sub>2</sub> más baja posible en la tabla empírica mientras se mantenían los objetivos de oxigenación. La tabla empírica fue adoptada del grupo de control del reciente ensayo OSCILLATE. El cruce a la estrategia guiada por Pes estaba prohibido. Las mediciones de Presión transpulmonar no se divulgaron al equipo de tratamiento ni se consideraron al seleccionar</p> |

|                        |                                                                                                                                                                                                                                                                                                                                                                                                                                                                                                                                                                                                                                                                                                                                                                                                                                                                                                                                                                                                      |
|------------------------|------------------------------------------------------------------------------------------------------------------------------------------------------------------------------------------------------------------------------------------------------------------------------------------------------------------------------------------------------------------------------------------------------------------------------------------------------------------------------------------------------------------------------------------------------------------------------------------------------------------------------------------------------------------------------------------------------------------------------------------------------------------------------------------------------------------------------------------------------------------------------------------------------------------------------------------------------------------------------------------------------|
|                        | <p>PEEP. Para disminuir la sobredistensión, el volumen corriente podría reducirse a tan solo 4 ml / kg de PBW si la presión de la meseta superaba los 35 cm H<sub>2</sub>O. Para disnea o acidemia severas, el volumen corriente podría aumentar hasta 8 ml / kg de peso corporal predicho, siempre que la presión meseta permaneciera en 35 cm H<sub>2</sub>O o menos.</p> <p><u>Cointervenciones:</u> después de obtener las mediciones iniciales, se realizó una sola maniobra de reclutamiento, que consistió en una respiración sostenida a una presión de 35 cm H<sub>2</sub>O durante 30 segundos. La configuración del ventilador se ajustó por protocolo. La sedación, el bloqueo neuromuscular y la reanimación se administraron a discreción del médico tratante. El destete del ventilador fue dirigido por protocolo. Los pacientes continuaron con el protocolo durante 28 días o hasta que respiraron sin ayuda, retiraron el consentimiento, fueron dados de alta o fallecieron.</p> |
| Resultados             | <p>Mortalidad en Terapia intensiva</p> <p>Días de ventilación mecánica</p> <p>Días de internación en Terapia Intensiva</p> <p>Eventos adversos</p>                                                                                                                                                                                                                                                                                                                                                                                                                                                                                                                                                                                                                                                                                                                                                                                                                                                   |
| Financiamiento         | <p>Este estudio fue financiado por el National Heart, Lung, and Blood Institute de los Estados Unidos. (Subvención UM1-HL108724).</p>                                                                                                                                                                                                                                                                                                                                                                                                                                                                                                                                                                                                                                                                                                                                                                                                                                                                |
| Declaración de interés | <p>Todos los autores informaron haber recibido apoyo del National Heart, Lung, and Blood Institute de los Estados Unidos. La Sra. Banner-Goodspeed informó haber recibido subvenciones del Departamento de Defensa. El Dr. Gong informó que recibió subvenciones de la Agency for Healthcare and Research Quality fuera del trabajo presentado. El Dr. Novack informó que recibió honorarios personales de consultores de CardioMed fuera del trabajo presentado. El Dr. Talmor informó que recibió honorarios y fondos de subvención de Hamilton Medical fuera del trabajo presentado.</p>                                                                                                                                                                                                                                                                                                                                                                                                          |
| Notas                  | <p>Se retiró el consentimiento para 2 pacientes asignados a la estrategia PEEP-FIO<sub>2</sub> antes del inicio del protocolo. No se pudo insertar con éxito un catéter con balón esofágico en 1</p>                                                                                                                                                                                                                                                                                                                                                                                                                                                                                                                                                                                                                                                                                                                                                                                                 |

|                                              |                                                                                                                                                                                                                                                                                            |                                                                                                                                                                                                                  |
|----------------------------------------------|--------------------------------------------------------------------------------------------------------------------------------------------------------------------------------------------------------------------------------------------------------------------------------------------|------------------------------------------------------------------------------------------------------------------------------------------------------------------------------------------------------------------|
|                                              | paciente aleatorizado para PEEP guiada por Pes; ese paciente no se sometió a procedimientos de estudio posteriores, pero completó el seguimiento de 28 días y se incluyó en los análisis de todos los desenlaces clínicos.<br><u>Contacto:</u> Dr Daniel Talmor, dtalmor@bidmc.harvard.edu |                                                                                                                                                                                                                  |
| <b>Riesgo de sesgo</b>                       |                                                                                                                                                                                                                                                                                            |                                                                                                                                                                                                                  |
| <b>Sesgo</b>                                 | <b>Juicio de los autores</b>                                                                                                                                                                                                                                                               | <b>Apoyo al juicio</b>                                                                                                                                                                                           |
| Generación de la secuencia de aleatorización | Bajo riesgo                                                                                                                                                                                                                                                                                | Los investigadores describen un componente aleatorio en el proceso de generación de la secuencia.                                                                                                                |
| Ocultamiento de la asignación                | Bajo riesgo                                                                                                                                                                                                                                                                                | Los participantes e investigadores que inscribieron a los participantes no pudieron prever la asignación.                                                                                                        |
| Cegamiento de participantes y personal       | Bajo riesgo                                                                                                                                                                                                                                                                                | Sin información disponible. Dado que las intervenciones eran visiblemente diferentes es probable que no haya habido cegamiento, pero es probable que el resultado no se vea afectado por la falta de cegamiento. |
| Cegamiento de evaluadores de resultados      | Bajo riesgo                                                                                                                                                                                                                                                                                | Sin información disponible. Dado que las intervenciones eran visiblemente diferentes es probable que no haya habido cegamiento, pero es probable que el resultado no se vea afectado por la falta de cegamiento. |
| Datos de resultados incompletos              | Bajo riesgo                                                                                                                                                                                                                                                                                | Las razones por las que faltan datos de resultados probablemente no estén relacionadas con un resultado verdadero.                                                                                               |
| Informe selectivo de resultados              | Bajo riesgo                                                                                                                                                                                                                                                                                | Todos los resultados de interés para esta revisión fueron reportados.                                                                                                                                            |
| Otros sesgos                                 | Bajo riesgo                                                                                                                                                                                                                                                                                | El estudio parece estar libre de                                                                                                                                                                                 |

|  |                         |
|--|-------------------------|
|  | otras fuentes de sesgo. |
|--|-------------------------|

## Obi 2018

|               |                                                                                                                                                                                                                                                                                                                                                                                                                                                                                                                                                                                                                                                                                                                                                                                                                                                                                                                                                                                                                                                                                                                                                                                                            |
|---------------|------------------------------------------------------------------------------------------------------------------------------------------------------------------------------------------------------------------------------------------------------------------------------------------------------------------------------------------------------------------------------------------------------------------------------------------------------------------------------------------------------------------------------------------------------------------------------------------------------------------------------------------------------------------------------------------------------------------------------------------------------------------------------------------------------------------------------------------------------------------------------------------------------------------------------------------------------------------------------------------------------------------------------------------------------------------------------------------------------------------------------------------------------------------------------------------------------------|
| Métodos       | <p><u>Diseño del estudio</u>: ensayo aleatorizado de grupos paralelos</p> <p><u>Fechas de estudio</u>: enero 2011 hasta septiembre 2013.</p> <p><u>Entorno</u>: internación, centro único, nacional.</p> <p><u>País</u>: Estados Unidos</p>                                                                                                                                                                                                                                                                                                                                                                                                                                                                                                                                                                                                                                                                                                                                                                                                                                                                                                                                                                |
| Participantes | <p>25 pacientes con obesidad mórbida (<math>BMI \geq 40</math>) dependientes del ventilador (definidos como al menos una falla previa en el destete) con requerimiento de traqueotomía, sin enfermedad pulmonar subyacente que impida el proceso de destete, estables hemodinámicamente, que toleren modos ventilatorios de asistencia parcial con <math>FiO_2 \leq 60\%</math>, sin alteraciones nasofaríngeas que impidan la colocación del cateter esofágico.</p> <p><u>Criterio de exclusión</u>:</p> <p>Falta de consentimiento</p> <p>Paciente considerado no desvinculable de VM según el juicio clínico del médico pulmonar</p> <p>Enfermedad pulmonar, cardíaca o neuromuscular significativa que interferiría o impediría el destete del ventilador, incluida una infección pulmonar activa y continua.</p> <p>Contraindicaciones para la colocación de un dispositivo de control de la presión esofágica, como ulceraciones, tumores, diverticulitis, varices hemorrágicas no controladas, sinusitis, epistaxis o cirugía nasofaríngea reciente.</p> <p><u>Edad</u>:</p> <p>Grupo Intervención: media <math>58 \pm 9</math> años .</p> <p>Grupo Control: media <math>53 \pm 15</math> años.</p> |

|                |                                                                                                                                                                                                                                                                                                                                                                                                                                                                                                                                                                                                                                                                                                                                                                                                                                                                                                                                                                                                                                                                                                                                                                                                                                                                                                                                                                                                                                                                                                                                                                                                                                                                                                                                                                                            |
|----------------|--------------------------------------------------------------------------------------------------------------------------------------------------------------------------------------------------------------------------------------------------------------------------------------------------------------------------------------------------------------------------------------------------------------------------------------------------------------------------------------------------------------------------------------------------------------------------------------------------------------------------------------------------------------------------------------------------------------------------------------------------------------------------------------------------------------------------------------------------------------------------------------------------------------------------------------------------------------------------------------------------------------------------------------------------------------------------------------------------------------------------------------------------------------------------------------------------------------------------------------------------------------------------------------------------------------------------------------------------------------------------------------------------------------------------------------------------------------------------------------------------------------------------------------------------------------------------------------------------------------------------------------------------------------------------------------------------------------------------------------------------------------------------------------------|
|                | <p><u>Sexo:</u></p> <p>Grupo Intervención: 8 mujeres (62%), 5 hombres (38%)</p> <p>Grupo Control: 7 mujeres (58%), 5 hombres (42%)</p>                                                                                                                                                                                                                                                                                                                                                                                                                                                                                                                                                                                                                                                                                                                                                                                                                                                                                                                                                                                                                                                                                                                                                                                                                                                                                                                                                                                                                                                                                                                                                                                                                                                     |
| Intervenciones | <p><u>Grupo Intervención (n = 13):</u> Se utilizó monitorización de Pes para calcular la presión transpulmonar (Ptp), calculada como la diferencia entre la presión de la vía aérea (Pao) y Pes. La PEEP aplicada se ajustó para mantener la Ptp entre 0 y 10 cm H<sub>2</sub>O al final de la espiración. la monitorización de Pes se mantuvo durante un máximo de 7 días, pero se retiró antes si un sujeto lograba la desvinculación.</p> <p><u>Grupo control (n = 12):</u> la PEEP se ajustó para lograr la mejor complacencia estática efectiva (Cstat) y se ajustó en incrementos de 3 cmH<sub>2</sub>O hasta que hubo una mejoría inferior al 5% en el Cstat medido durante 5 respiraciones. Se eligió la PEEP con la mejor Cstat.</p> <p><u>Cointervenciones:</u> se ajustó la presión de soporte (PS) para mantener los volúmenes corrientes (VT) de 6 a 8 cm<sup>3</sup> / kg IBW. La FiO<sub>2</sub> se ajustó para mantener una saturación de oxígeno de 90% o más (SaO<sub>2</sub> ≥ 90%). Los sujetos descansaron en VM durante la noche y las pruebas de ventilación espontánea comenzaron a la mañana siguiente. Se repitieron las evaluaciones de PEEP diariamente a las 8 am antes de iniciar las pruebas de ventilación espontánea para asegurar que la PEEP permaneciera optimizada antes de la prueba. Los sujetos realizaron pruebas de ventilación espontánea incrementales comenzando con una prescripción inicial de 1 a 2 horas; sin embargo, continuaron mientras los sujetos permanecieron clínicamente estables con respecto a la frecuencia respiratoria, la saturación de oxígeno y la hemodinamia. Los sujetos se consideraron desvinculados con éxito si respiraba espontáneamente sin soporte ventilatorio durante al menos 24 horas para el día 30.</p> |
| Resultados     | Días de ventilación mecánica                                                                                                                                                                                                                                                                                                                                                                                                                                                                                                                                                                                                                                                                                                                                                                                                                                                                                                                                                                                                                                                                                                                                                                                                                                                                                                                                                                                                                                                                                                                                                                                                                                                                                                                                                               |
| Financiamiento | Los autores no recibieron apoyo financiero para la investigación, autoría y / o publicación del estudio.                                                                                                                                                                                                                                                                                                                                                                                                                                                                                                                                                                                                                                                                                                                                                                                                                                                                                                                                                                                                                                                                                                                                                                                                                                                                                                                                                                                                                                                                                                                                                                                                                                                                                   |

|                        |                                                                                                                                                                                                           |
|------------------------|-----------------------------------------------------------------------------------------------------------------------------------------------------------------------------------------------------------|
| Declaración de interés | Los autores declararon que no existen conflictos de interés potenciales con respecto a la investigación, autoría y / o publicación del estudio.                                                           |
| Notas                  | Dos sujetos con violaciones de protocolo muy tempranas de quienes no se recopilaron datos fueron excluidos de la población por intención de tratar.<br><u>Contacto:</u> Dr Ogugua Ndili Obi, obio@ecu.edu |

## Riesgo de sesgo

| Sesgo                                        | Juicio de los autores | Apoyo al juicio                                                                                                                                                                                                |
|----------------------------------------------|-----------------------|----------------------------------------------------------------------------------------------------------------------------------------------------------------------------------------------------------------|
| Generación de la secuencia de aleatorización | Riesgo incierto       | Información insuficiente sobre el proceso de generación de secuencias para permitir el juicio de "Bajo riesgo" o "Alto riesgo".                                                                                |
| Ocultamiento de la asignación                | Riesgo incierto       | Información insuficiente para permitir el juicio de "Bajo riesgo" o "Alto riesgo".                                                                                                                             |
| Cegamiento de participantes y personal       | Bajo riesgo           | Sin cegamiento o cegamiento incompleto, pero es probable que el resultado no se vea afectado por la falta de cegamiento.                                                                                       |
| Cegamiento de evaluadores de resultados      | Bajo riesgo           | No hay cegamiento de la evaluación de resultados, pero es probable que la medición del resultado no se vea influenciada por la falta de cegamiento.                                                            |
| Datos de resultados incompletos              | Bajo riesgo           | Los datos faltantes han sido imputados utilizando métodos apropiados.                                                                                                                                          |
| Informe selectivo de resultados              | Bajo riesgo           | El protocolo del estudio está disponible y todos los resultados pre especificados (primarios y secundarios) del estudio que son de interés en la revisión se informaron de la manera previamente especificada. |

|              |             |                                                          |
|--------------|-------------|----------------------------------------------------------|
| Otros sesgos | Bajo riesgo | El estudio parece estar libre de otras fuentes de sesgo. |
|--------------|-------------|----------------------------------------------------------|

## Talmor 2008

|                |                                                                                                                                                                                                                                                                                                                                                                                                                                                                                                                                                                                                                                                                                                                                           |
|----------------|-------------------------------------------------------------------------------------------------------------------------------------------------------------------------------------------------------------------------------------------------------------------------------------------------------------------------------------------------------------------------------------------------------------------------------------------------------------------------------------------------------------------------------------------------------------------------------------------------------------------------------------------------------------------------------------------------------------------------------------------|
| Métodos        | <p><u>Diseño del estudio</u>: ensayo piloto aleatorizado y controlado</p> <p><u>Fechas de estudio</u>: no disponibles.</p> <p><u>Entorno</u>: internación, centro único.</p> <p><u>País</u>: Estados Unidos.</p>                                                                                                                                                                                                                                                                                                                                                                                                                                                                                                                          |
| Participantes  | <p>61 pacientes con SDRA según la definición de la Conferencia de Consenso Europeo Americano.</p> <p><u>Criterios de exclusión</u>:</p> <p>Lesión reciente u otra condición patológica del esófago</p> <p>Pacientes con varices esofágicas</p> <p>Pacientes con trauma esofágico</p> <p>Pacientes con cirugía esofágica reciente</p> <p>Pacientes con coagulopatía</p> <p>Pacientes post trasplante</p> <p>Pacientes con fístula broncopleurales significativa</p> <p><u>Edad</u>:</p> <p>Grupo Intervención: media (DE) 54.5 ± 16.1 años</p> <p>Grupo Control: media (DE) 51,2 ± 23,0 años</p> <p><u>Sexo</u>:</p> <p>Grupo Intervención: 11 mujeres (37%), 19 hombres (63%)</p> <p>Grupo Control: 14 mujeres(45%), 17 hombres (55%)</p> |
| Intervenciones | <p><u>Grupo Intervención (n = 30)</u>: ventilación mecánica con ajustes determinados por las mediciones iniciales de presión esofágica. El volumen corriente se estableció en 6 ml por kilogramo de peso corporal predicho. Los niveles de PEEP se establecieron para lograr una presión transpulmonar de 0 a 10 cm de agua al final de la espiración, de acuerdo con una escala móvil basada en la</p>                                                                                                                                                                                                                                                                                                                                   |



|                        |                                                                                                                                                                                                                                                                                                                                                                                                                                                                                                                                                                                                                                                                                                                                                                                                                                                                                                                                                                                                                                                                            |
|------------------------|----------------------------------------------------------------------------------------------------------------------------------------------------------------------------------------------------------------------------------------------------------------------------------------------------------------------------------------------------------------------------------------------------------------------------------------------------------------------------------------------------------------------------------------------------------------------------------------------------------------------------------------------------------------------------------------------------------------------------------------------------------------------------------------------------------------------------------------------------------------------------------------------------------------------------------------------------------------------------------------------------------------------------------------------------------------------------|
|                        | <p>presión parcial de oxígeno arterial (PaO<sub>2</sub>) y la fracción de oxígeno inspirado (FiO<sub>2</sub>). También se limitó el volumen corriente para mantener la presión transpulmonar a menos de 25 cm de agua al final de la inspiración.</p> <p><u>Grupo control (n = 31)</u>: tratado de acuerdo con la estrategia de bajo volumen corriente reportada por el estudio ARDSNet del National Heart, Lung, and Blood Institute de los Estados Unidos.</p> <p><u>Cointervenciones</u>: Los objetivos de la ventilación mecánica incluían una PaO<sub>2</sub> de 55 a 120 mm Hg o una lectura de oxímetro de pulso del 88 al 98%, un pH arterial de 7.30 a 7.45 y una presión parcial de dióxido de carbono arterial (PaCO<sub>2</sub>) de 40 a 60 mm Hg. Los miembros del equipo primario de la UCI utilizaron protocolos para guiar la reanimación hemodinámica, la sedación, el destete de la ventilación y otras intervenciones estándar relacionadas con el cuidado del ventilador. Estos estándares de atención se aplicaron agresivamente en ambos grupos.</p> |
| Resultados             | <p>Mortalidad en Terapia intensiva</p> <p>Días de ventilación mecánica</p> <p>Días de internación en Terapia Intensiva</p> <p>Eventos adversos</p>                                                                                                                                                                                                                                                                                                                                                                                                                                                                                                                                                                                                                                                                                                                                                                                                                                                                                                                         |
| Financiamiento         | <p>Ninguna entidad comercial que proporciona equipos o dispositivos tuvo un papel en ningún aspecto de este estudio. Apoyado en parte por una subvención del National Heart, Lung, and Blood Institute de los Estados Unidos (HL-52586).</p>                                                                                                                                                                                                                                                                                                                                                                                                                                                                                                                                                                                                                                                                                                                                                                                                                               |
| Declaración de interés | <p>El Dr. Malhotra informa que recibió honorarios por consultoría de Respironics. El Sr. Ritz informa haber recibido honorarios por consultoría de INO Therapeutics y honorarios por conferencias de Trianim y sirve como asesor de Cardinal Health and Respironics.</p> <p>No se informó de ningún otro conflicto de interés potencial relevante para este artículo.</p>                                                                                                                                                                                                                                                                                                                                                                                                                                                                                                                                                                                                                                                                                                  |
| Notas                  | <p>Los días de ventilación mecánica se transformaron porque los autores midieron los días libres de ventilación mecánica a los 28 días.</p>                                                                                                                                                                                                                                                                                                                                                                                                                                                                                                                                                                                                                                                                                                                                                                                                                                                                                                                                |

|                                              |                              | Contacto: Dr Daniel Talmor, <a href="mailto:dtalmor@bidmc.harvard.edu">dtalmor@bidmc.harvard.edu</a>                                                                                                                                                                                                |
|----------------------------------------------|------------------------------|-----------------------------------------------------------------------------------------------------------------------------------------------------------------------------------------------------------------------------------------------------------------------------------------------------|
| <b>Riesgo de sesgo</b>                       |                              |                                                                                                                                                                                                                                                                                                     |
| <b>Sesgo</b>                                 | <b>Juicio de los autores</b> | <b>Apoyo al juicio</b>                                                                                                                                                                                                                                                                              |
| Generación de la secuencia de aleatorización | Bajo riesgo                  | Los investigadores describen un componente aleatorio en el proceso de generación de la secuencia.                                                                                                                                                                                                   |
| Ocultamiento de la asignación                | Bajo riesgo                  | Los participantes y los investigadores que inscribieron a los participantes no pudieron prever la asignación porque se utilizaron sobres cerrados, opacos y numerados secuencialmente, desarrollados por un estadista independiente para ocultar la asignación. (información brindada por el autor) |
| Cegamiento de participantes y personal       | Bajo riesgo                  | Sin información disponible. Dado que las intervenciones eran visiblemente diferentes es probable que no haya habido cegamiento, pero es probable que el resultado no se vea afectado por la falta de cegamiento.                                                                                    |
| Cegamiento de evaluadores de resultados      | Bajo riesgo                  | Sin información disponible. Dado que las intervenciones eran visiblemente diferentes es probable que no haya habido cegamiento, pero es probable que el resultado no se vea afectado por la falta de cegamiento.                                                                                    |
| Datos de resultados incompletos              | Bajo riesgo                  | Los datos de resultados estaban disponibles para todos los participantes.                                                                                                                                                                                                                           |
| Informe selectivo de resultados              | Alto riesgo                  | El protocolo del estudio está disponible y no se han informado                                                                                                                                                                                                                                      |

|              |             |                                                          |
|--------------|-------------|----------------------------------------------------------|
|              |             | todos los resultados pre especificados del estudio.      |
| Otros sesgos | Bajo riesgo | El estudio parece estar libre de otras fuentes de sesgo. |

## Wang 2019

|                |                                                                                                                                                                                                                                                                                                                                                                                                                                                                                                                                                                                                                                                                                                                                                                                                                                                                 |
|----------------|-----------------------------------------------------------------------------------------------------------------------------------------------------------------------------------------------------------------------------------------------------------------------------------------------------------------------------------------------------------------------------------------------------------------------------------------------------------------------------------------------------------------------------------------------------------------------------------------------------------------------------------------------------------------------------------------------------------------------------------------------------------------------------------------------------------------------------------------------------------------|
| Métodos        | <p><u>Diseño del estudio</u>: ensayo aleatorizado de grupos paralelos</p> <p><u>Fechas de estudio</u>: no disponibles.</p> <p><u>Entorno</u>: internación, centro único, nacional.</p> <p><u>País</u>: China.</p>                                                                                                                                                                                                                                                                                                                                                                                                                                                                                                                                                                                                                                               |
| Participantes  | <p>23 pacientes con SDRA según la definición de la Conferencia de Consenso de Berlín luego de un trauma, con un puntaje de severidad de lesión (ISS) &gt; 16.</p> <p><u>Criterio de exclusión</u>:</p> <p>Mujeres embarazadas o lactantes;</p> <p>sujetos menores de 18 años de edad;</p> <p>Escala de coma de Glasgow (GCS) &lt;8 en pacientes con lesión cerebral traumática severa;</p> <p>paciente con inestabilidad hemodinámica;</p> <p>pacientes que pueden morir dentro de las 24 horas;</p> <p>pacientes que no son aptos para la implantación de un catéter esofágico.</p> <p><u>Edad</u>:</p> <p>Grupo Intervención: media (DE) 32,5 ± 12,3 años.</p> <p>Grupo Control: media (DE) 35,6 ± 10,7 años.</p> <p><u>Sexo</u>:</p> <p>Grupo Intervención: 3 mujeres (25%), 9 hombres (75%)</p> <p>Grupo Control: 3 mujeres (27.7%), 8 hombres (72.3%).</p> |
| Intervenciones | <p><u>Grupo Intervención (n = 12)</u>: La PEEP se ajustó de</p>                                                                                                                                                                                                                                                                                                                                                                                                                                                                                                                                                                                                                                                                                                                                                                                                 |

|                        |                                                                                                                                                                                                                                                                                                                                                                                                                                                                                                                                                                                                                                                                                                                                                                                                                                                                                                                                                                                                                                                                                                                                                                                                                                                                      |
|------------------------|----------------------------------------------------------------------------------------------------------------------------------------------------------------------------------------------------------------------------------------------------------------------------------------------------------------------------------------------------------------------------------------------------------------------------------------------------------------------------------------------------------------------------------------------------------------------------------------------------------------------------------------------------------------------------------------------------------------------------------------------------------------------------------------------------------------------------------------------------------------------------------------------------------------------------------------------------------------------------------------------------------------------------------------------------------------------------------------------------------------------------------------------------------------------------------------------------------------------------------------------------------------------|
|                        | <p>acuerdo con la presión esofágica, es decir, la PEEP se aumentó primero de 5 cm H<sub>2</sub>O a 8 cm H<sub>2</sub>O, se incrementó progresivamente en 2 cm H<sub>2</sub>O y el valor máximo de PEEP se mantuvo por debajo de 20 cm H<sub>2</sub>O. Mientras tanto, se midió la presión esofágica y se seleccionó el valor mínimo de PEEP para mantener la presión transpulmonar al final de la espiración de 0 a 10 cm H<sub>2</sub>O como la mejor PEEP. El volumen corriente se estableció en 6–8 ml / kg (peso ideal), y la PEEP se ajustó de acuerdo con la presión esofágica para que la presión transpulmonar al final de la espiración mantenga el número positivo más pequeño dentro de 0–10 cm H<sub>2</sub>O.</p> <p><u>Grupo control (n = 11)</u>: tratado de acuerdo con la estrategia de bajo volumen corriente reportada por el estudio ARDSNet del National Heart, Lung, and Blood Institute de los Estados Unidos.</p> <p><u>Cointervenciones</u>: El objetivo de la ventilación mecánica de estos dos grupos de pacientes fue mantener la PaO<sub>2</sub> entre 60-120 mm Hg o que la saturación de oxígeno alcanzara el 90–100%, mientras que el pH en sangre arterial se mantenga entre 7.30–7.45 y la PaCO<sub>2</sub> entre 40– 60 mmHg.</p> |
| Resultados             | <p>Días de ventilación mecánica</p> <p>Días de internación en Terapia Intensiva</p>                                                                                                                                                                                                                                                                                                                                                                                                                                                                                                                                                                                                                                                                                                                                                                                                                                                                                                                                                                                                                                                                                                                                                                                  |
| Financiamiento         | No disponible                                                                                                                                                                                                                                                                                                                                                                                                                                                                                                                                                                                                                                                                                                                                                                                                                                                                                                                                                                                                                                                                                                                                                                                                                                                        |
| Declaración de interés | Los autores declaran que no tienen ningún interés asociativo comercial que represente un conflicto de intereses en relación con el trabajo presentado.                                                                                                                                                                                                                                                                                                                                                                                                                                                                                                                                                                                                                                                                                                                                                                                                                                                                                                                                                                                                                                                                                                               |
| Notas                  | <p>Se contactó a uno de los autores a fin de solicitar información adicional para la valoración del riesgo de sesgo.</p> <p><u>Contacto</u>: Dr Bin Wu, wubin_dn@sina.com</p>                                                                                                                                                                                                                                                                                                                                                                                                                                                                                                                                                                                                                                                                                                                                                                                                                                                                                                                                                                                                                                                                                        |

## Riesgo de sesgo

| Sesgo                                        | Juicio de los autores | Apoyo al juicio                                                                        |
|----------------------------------------------|-----------------------|----------------------------------------------------------------------------------------|
| Generación de la secuencia de aleatorización | Bajo riesgo           | Los investigadores describen un componente aleatorio en el proceso de generación de la |

|                                         |                 |                                                                                    |
|-----------------------------------------|-----------------|------------------------------------------------------------------------------------|
|                                         |                 | secuencia.                                                                         |
| Ocultamiento de la asignación           | Riesgo incierto | Información insuficiente para permitir el juicio de "Bajo riesgo" o "Alto riesgo". |
| Cegamiento de participantes y personal  | Riesgo incierto | Información insuficiente para permitir el juicio de "Bajo riesgo" o "Alto riesgo". |
| Cegamiento de evaluadores de resultados | Riesgo incierto | Información insuficiente para permitir el juicio de "Bajo riesgo" o "Alto riesgo". |
| Datos de resultados incompletos         | Riesgo incierto | Información insuficiente para permitir el juicio de "Bajo riesgo" o "Alto riesgo". |
| Informe selectivo de resultados         | Riesgo incierto | Información insuficiente para permitir el juicio de "Bajo riesgo" o "Alto riesgo". |
| Otros sesgos                            | Riesgo incierto | Información insuficiente para evaluar si existe un riesgo importante de sesgo.     |

## Características de los estudios excluidos

### Wu 2016: Transpulmonary pressure guided optimal positive end-expiratory pressure selection in patients with acute respiratory distress syndrome

|                     |                                                                                                                                                                                                                                                                                                                                       |
|---------------------|---------------------------------------------------------------------------------------------------------------------------------------------------------------------------------------------------------------------------------------------------------------------------------------------------------------------------------------|
| Motivo de exclusión | Diseño auto controlado. Incluyó 28 pacientes con SDRA < 3 días de evolución que recibieron aleatoriamente titulación de PEEP según Presión transpulmonar, menor fracción de espacio muerto, mayor complacencia pulmonar estática y óptima oxigenación, respectivamente. Sin resultados clínicos de interés para la presente revisión. |
|---------------------|---------------------------------------------------------------------------------------------------------------------------------------------------------------------------------------------------------------------------------------------------------------------------------------------------------------------------------------|

### Bergez 2019: PEEP titration in moderate to severe ARDS: plateau versus transpulmonary pressure

|                     |                                                                                                                                                                                                                                                                              |
|---------------------|------------------------------------------------------------------------------------------------------------------------------------------------------------------------------------------------------------------------------------------------------------------------------|
| Motivo de exclusión | Diseño <i>crossover</i> . Incluyó 19 pacientes con SDRA moderado a severo. Comparando el efecto del seteo de PEEP según la máxima Pplat vs mantener Ptp al final de la espiración entre 0-5cmH <sub>2</sub> O. Sin resultados clínicos de interés para la presente revisión. |
|---------------------|------------------------------------------------------------------------------------------------------------------------------------------------------------------------------------------------------------------------------------------------------------------------------|

## Bako 2019: Transpulmonary pressure guided APRV ventilation, new perspective for ventilatory settings in ARDS patients

|                     |                                                                                                                                                                                                                                                     |
|---------------------|-----------------------------------------------------------------------------------------------------------------------------------------------------------------------------------------------------------------------------------------------------|
| Motivo de exclusión | Diseño auto controlado. Incluyó pacientes con SDRA moderado y severo, comparando 4 métodos de titulación de PEEP durante la utilización de APRV (Airway Pressure Release Ventilation) Sin resultados clínicos de interés para la presente revisión. |
|---------------------|-----------------------------------------------------------------------------------------------------------------------------------------------------------------------------------------------------------------------------------------------------|

## Características de los estudios en curso

|                    |                                                                                                                                                                                                                                                                                                                                                                                                                                                                                                                                                                                                                                     |
|--------------------|-------------------------------------------------------------------------------------------------------------------------------------------------------------------------------------------------------------------------------------------------------------------------------------------------------------------------------------------------------------------------------------------------------------------------------------------------------------------------------------------------------------------------------------------------------------------------------------------------------------------------------------|
| Nombre del estudio | Applied Research of New Lung Ventilation Strategies Guided by Transpulmonary Pressure in Extracorporeal Membrane Oxygenation for Acute Respiratory Distress Syndrome.                                                                                                                                                                                                                                                                                                                                                                                                                                                               |
| Métodos            | <u>Diseño del estudio</u> : ensayo clínico, aleatorizado, de asignación paralela.<br><u>País</u> : China.                                                                                                                                                                                                                                                                                                                                                                                                                                                                                                                           |
| Participantes      | Pacientes con SDRA y requerimiento de Oxigenación por Membrana Extra Corpórea (ECMO).                                                                                                                                                                                                                                                                                                                                                                                                                                                                                                                                               |
| Intervenciones     | <u>Grupo Intervención</u> : Nueva estrategia de ventilación en modo controlado por presión para mantener Presión Pico a menos de 25 cmH <sub>2</sub> O; PEEP ajustada a un nivel tal que la presión transpulmonar espiratoria permanezca entre 0 y 5 cmH <sub>2</sub> O; frecuencia respiratoria de 10 respiraciones por minuto; FiO <sub>2</sub> inferior a 0,5.<br><u>Grupo control</u> : Estrategia de ventilación convencional en modo controlado por presión; manteniendo la presión pico entre 20 y 25 cmH <sub>2</sub> O; con PEEP entre 10 y 15 cmH <sub>2</sub> O; frecuencia respiratoria de 10 respiraciones por minuto; |

|                         |                                                      |
|-------------------------|------------------------------------------------------|
|                         | FiO <sub>2</sub> inferior a 0,5.                     |
| Resultados              | Desvinculación de ECMO.<br>Mortalidad a los 60 días. |
| Fecha de inicio         | 1 de Mayo, 2015.                                     |
| Información de contacto | Dr. Rui Wang,+86 18601342030, xuanben1985@163.com    |
| Notas                   |                                                      |

|                           |                                                                                                                                                                       |
|---------------------------|-----------------------------------------------------------------------------------------------------------------------------------------------------------------------|
| <b>Nombre del estudio</b> | The Study of Using Esophageal Pressure to Guide the PEEP Setting in Abdominal Hypertension Patients Who Undergoing Mechanical Ventilation.                            |
| Métodos                   | <u>Diseño del estudio</u> : ensayo clínico, aleatorizado, de asignación paralela.<br><u>País</u> : Suiza.                                                             |
| Participantes             | Pacientes con hipertensión abdominal y requerimiento de ventilación mecánica.                                                                                         |
| Intervenciones            | <u>Grupo Intervención</u> : PEEP ajustada según la presión esofágica.<br><u>Grupo control</u> : PEEP ajustada según PaO <sub>2</sub> y FiO <sub>2</sub> del paciente. |
| Resultados                | Días libres de ventilación mecánica a los 28 días.<br>Mortalidad a los 28 días.                                                                                       |
| Fecha de inicio           | 5 de abril, 2013.                                                                                                                                                     |
| Información de contacto   | MSc li gang, +86-025-80860066, leeg871027@163.com                                                                                                                     |
| Notas                     |                                                                                                                                                                       |

|                           |                                                                                             |
|---------------------------|---------------------------------------------------------------------------------------------|
| <b>Nombre del estudio</b> | Esophageal Pressure-Guided Optimal PEEP/mPaw in CMV and HFOV: the EPOCH Study.              |
| Métodos                   | <u>Diseño del estudio</u> : ensayo clínico, aleatorizado, cruzado.<br><u>País</u> : Canadá. |

|                         |                                                                                                                                                               |
|-------------------------|---------------------------------------------------------------------------------------------------------------------------------------------------------------|
| Participantes           | Pacientes con SDRA moderado o severo según la definición de Berlín.                                                                                           |
| Intervenciones          | <u>Grupo Intervención:</u> Ventilación mecánica convencional guiada por Presión transpulmonar.<br><u>Grupo control:</u> Ventilación de alta frecuencia.       |
| Resultados              | Injuria pulmonar asociada a la ventilación mediante citoquinas séricas.<br>Reclutamiento pulmonar y sobredistensión tidal.<br>Función del ventrículo derecho. |
| Fecha de inicio         | Enero 2015.                                                                                                                                                   |
| Información de contacto | MD, PhD Eddy Fan, University Health Network, Toronto.                                                                                                         |
| Notas                   |                                                                                                                                                               |

## Características de los estudios pendientes de clasificación

### Li 2016

|                |                                                                                                                                                                                                |
|----------------|------------------------------------------------------------------------------------------------------------------------------------------------------------------------------------------------|
| Métodos        | <u>Diseño del estudio:</u> ensayo prospectivo, aleatorizado, abierto.<br><u>Fechas de estudio:</u> Octubre 2011 a Marzo 2013.<br><u>Entorno:</u> internación, nacional.<br><u>País:</u> China. |
| Participantes  | 35 pacientes con pancreatitis aguda grave según los criterios de Atlanta, combinados con hipertensión intra abdominal (presión intra abdominal superior a 12 mmHg)                             |
| Intervenciones | <u>Grupo Intervención:</u> Ajustes de PEEP guiada por Presión esofágica.<br><u>Grupo control:</u> la PEEP se ajustó según una tabla PEEP FiO <sub>2</sub> .                                    |
| Resultados     | Días de ventilación mecánica.                                                                                                                                                                  |
| Notas          | Publicado solo como resumen.                                                                                                                                                                   |
