# Supplementary material
Source: Elsevier journal article supplement (https://www.sciencedirect.com/science/article/pii/S0210569120300619)
Supplement: mmc4 [file S0210569120300619:mmc4.pdf]

## **Apéndice D. Diferencias entre el protocolo y la revisión**

No se encontró ningún estudio observacional que cumpliera con los criterios de elegibilidad de la presente revisión. Por lo tanto, tampoco se realizó evaluación del riesgo de sesgo de estudios observacionales mediante la herramienta ROBINS-I.

Debido al número final de estudios incluidos, no se realizó análisis de sesgo de publicación.

No se investigó el efecto de la intervención en el subgrupo de pacientes que recibieron VNI versus pacientes que recibieron ventilación mecánica invasiva ya que ninguno de los estudios incluidos incluyó pacientes que recibieran VNI. Tampoco se investigó el efecto de la intervención en el subgrupo de ensayos clínicos controlados aleatorizados y cuasi aleatorizados versus estudios observacionales ya que no se encontraron estudios cuasi aleatorizados u observacionales que cumplieran los criterios de elegibilidad.

El análisis de sensibilidad solo se realizó para los días de Ventilación Mecánica y los días de hospitalización en Terapia Intensiva, ya que fueron los únicos resultados de interés en los que se incluyeron estudios con riesgo de sesgo alto o incierto en los dominios de ocultamiento de la asignación y generación de secuencia de aleatorización.
